# Supplementary material for: Characteristics of rhizosphere and bulk soil microbial communities in pear trees
Source: PeerJ. 2026 Jan 15;14:e20627. doi: 10.7717/peerj.20627 (PMC12812276; doi:10.7717/peerj.20627)
Supplement: Supplemental Information 1 [file peerj-14-20627-s001.xlsx]

## Sheet: Table S1
Table S1 Oligonucleotide primers used in this study
Primers	DNA sequences
338 F	5′-ACTCCTACGGGAGGCAGCA-3′
806 R	5′-GGACTACHVGGGTWTCTAAT-3′

## Sheet: Table S2
Table S2 Pyrosequencing data of 16S rRNA
Treatment	Sample ID	Raw Reads	Clean Reads	Effective Reads	OTU Numbers	AvgLen(bp)	GC(%)	Q20(%)	Q30(%)	Effective(%)
YLX	YLX1	99380	90752	63114	951	422	54.31	98.95	95.71	63.51
	YLX2	102287	94813	63284	1095	422	53.85	99.17	96.42	61.87
	YLX3	108182	99967	63216	850	422	54.21	99.13	96.3	58.43
	YLX4	104407	96383	63175	968	422	54.49	99.15	96.37	60.51
	YLX5	112848	104665	63909	837	422	53.45	99.16	96.38	56.63
	YLX6	103773	96279	66324	1028	421	54.99	99.16	96.43	63.91
	YLX7	103398	95707	67355	917	422	54.76	99.15	96.34	65.14
YLXY	YLX1Y	111902	103501	66525	944	422	56.26	99.15	96.4	59.45
	YLX2Y	115740	107174	66011	876	422	55.54	99.14	96.36	57.03
	YLX3Y	94788	87982	68742	1107	422	56.54	99.15	96.4	72.52
	YLX4Y	104079	96589	68670	1006	422	55.64	99.12	96.29	65.98
	YLX5Y	100128	92078	68195	963	422	56.03	99.1	96.25	68.11
	YLX6Y	98844	92095	69232	1071	422	55.79	99.16	96.42	70.04

## Sheet: Table S3
Table S3 Alpha diversity of of the pear tree rhizosphere and bulk soil samples
Treatment	Sample ID	ACE	Chao1	Simpson	Shannon	PD_whole_tree	Coverage
YLX	YLX1	952.415	951.075	0.9494	6.9634	99.6868	0.9999
	YLX2	1096.24	1095.03	0.9378	6.7486	141.561	0.9999
	YLX3	850.676	850.008	0.9295	6.5971	90.7483	1
	YLX4	972.431	968.41	0.9444	6.9977	105.696	0.9997
	YLX5	837.897	837.028	0.9192	6.4247	108.029	0.9999
	YLX6	1031.77	1028.5	0.9602	7.5312	95.8756	0.9998
	YLX7	917.287	917	0.9515	7.3609	90.1777	1
YLXY	YLX1Y	946.057	944.133	0.9606	7.5741	85.1948	0.9999
	YLX2Y	876.705	876.009	0.957	7.3968	95.6116	1
	YLX3Y	1108.72	1107.09	0.9822	8.3998	114.648	0.9999
	YLX4Y	1007.7	1006.1	0.96	7.6938	92.7259	0.9999
	YLX5Y	964.616	963.125	0.9648	7.7365	91.9764	0.9999
	YLX6Y	1072.3	1071.06	0.9684	7.9484	106.455	0.9999

## Sheet: Table S4
Table S4 Wilcoxon rank sum test to compare mean relative abundance of the pear rhizosphere and bulk soils at phylum level*
phylum	YLX(Mean)	YLX(Sd)	YLXY(Mean)	YLXY(Sd)	YLX::YLXY(p)	YLX::YLXY(p-corrected)
Proteobacteria	0.612412	0.0451113	0.463029	0.0492914	0.0026998	0.0242982
Acidobacteriota	0.0833871	0.0304982	0.138308	0.0394926	0.0151584	0.068213
Actinobacteriota	0.0572227	0.0233193	0.142092	0.0363482	0.0026998	0.0242982
Bacteroidota	0.0468284	0.0096535	0.0329183	0.00766975	0.022271	0.0911085
Firmicutes	0.0407339	0.0228239	0.00896733	0.00877113	0.010128	0.0569699
Chloroflexi	0.0132762	0.00580807	0.034599	0.0066196	0.0026998	0.0242982
Gemmatimonadota	0.00936924	0.00315935	0.0285834	0.00739191	0.0026998	0.0242982
Methylomirabilota	0.00757237	0.00326691	0.0153455	0.00607038	0.010128	0.0569699
Nitrospirota	0.00173054	0.000448242	0.00279133	0.000901907	0.0151584	0.068213
Latescibacterota	0.000378263	0.000338708	0	0	0.0321246	0.120467
Entotheonellaeota	0.000110246	0.000150211	0.00046626	0.000130281	0.010128	0.0569699
Armatimonadota	7.97e-05	5.93e-05	0.000484606	0.000163588	0.0026998	0.0242982
* Only the phyla with p value less than 0.05 were exhibted.

## Sheet: Table S5
Table S5 Wilcoxon rank sum test to compare mean relative abundance of the pear rhizosphere and bulk soils at family level*
family	YLX(Mean)	YLX(Sd)	YLXY(Mean)	YLXY(Sd)	YLX::YLXY(p)	YLX::YLXY(p-corrected)
Methylophilaceae	0.23004	0.0289501	0.175265	0.0287876	0.010128	0.117226
Diplorickettsiaceae	0.0405128	0.00537918	0.0302044	0.00551441	0.00664189	0.0976537
Pseudomonadaceae	0.0395582	0.0107418	0.0212231	0.00205146	0.0026998	0.063856
Neisseriaceae	0.0362291	0.00453657	0.0271379	0.00381396	0.00664189	0.0976537
Comamonadaceae	0.0299329	0.00813022	0.0217084	0.00401637	0.0321246	0.208045
Microscillaceae	0.0267882	0.00551274	0.0191833	0.00582724	0.022271	0.180827
Xanthomonadaceae	0.0262281	0.00199743	0.0219828	0.00742985	0.0455003	0.255177
Rhizobiaceae	0.0252398	0.00285388	0.0124257	0.00143049	0.0026998	0.063856
Bacillaceae	0.0219239	0.0160691	0.00202875	0.00109375	0.0026998	0.063856
Rhodobacteraceae	0.0215101	0.00367955	0.0151564	0.00242443	0.00664189	0.0976537
Caulobacteraceae	0.0193588	0.00253972	0.0126195	0.00241436	0.0026998	0.063856
Puniceicoccaceae	0.011698	0.00258859	0.0083452	0.00192286	0.0321246	0.208045
Nitrosomonadaceae	0.00998184	0.00201462	0.0183034	0.0032655	0.0026998	0.063856
Xanthobacteraceae	0.00943161	0.00272214	0.00544113	0.000940331	0.00427473	0.0750147
Pyrinomonadaceae	0.00846731	0.00286923	0.0222506	0.0124154	0.0455003	0.255177
Gemmatimonadaceae	0.00821058	0.00340414	0.0244314	0.00615175	0.0026998	0.063856
Holosporaceae	0.00631169	0.000949497	0.00431208	0.000645918	0.010128	0.117226
Nocardioidaceae	0.00621051	0.0023103	0.0116575	0.00745607	0.0321246	0.208045
Legionellaceae	0.00598929	0.00111987	0.00440753	0.000776408	0.022271	0.180827
Reyranellaceae	0.00589247	0.00241508	0.00255523	0.00168973	0.010128	0.117226
Enterococcaceae	0.00544285	0.00234807	0.00132481	0.00034573	0.0026998	0.063856
unclassified_Chloroflexi	0.00542151	0.00193606	0.0184787	0.00560129	0.0026998	0.063856
Parachlamydiaceae	0.00468054	0.000875456	0.00346351	0.000841552	0.0321246	0.208045
Thermoanaerobaculaceae	0.00405469	0.00181141	0.0100635	0.00494682	0.0321246	0.208045
Haliangiaceae	0.00384558	0.00221104	0.00868085	0.00470878	0.0321246	0.208045
Enterobacteriaceae	0.00378107	0.00176773	0.00105327	0.00050474	0.00427473	0.0750147
Streptococcaceae	0.0037656	0.00263268	0.00216466	0.00457171	0.0455003	0.255177
Solirubrobacteraceae	0.0035733	0.00215404	0.0145258	0.00466346	0.0026998	0.063856
uncultured_Firmicutes_bacterium	0.00341835	0.00189016	0.00903625	0.00316818	0.010128	0.117226
Azospirillaceae	0.00334447	0.000603591	0.00219218	0.000702759	0.022271	0.180827
Beijerinckiaceae	0.00320397	0.000527367	0.00247248	0.000630472	0.0455003	0.255177
unclassified_Subgroup_7	0.00304513	0.0014921	0.00919818	0.00355995	0.010128	0.117226
Clostridiaceae	0.0028629	0.00167991	0.000812602	0.000301824	0.00427473	0.0750147
67_14	0.00279407	0.00138741	0.010132	0.00492237	0.00664189	0.0976537
Hyphomicrobiaceae	0.00257106	0.00243559	0.000709584	0.000502821	0.0151584	0.14467
Moraxellaceae	0.00256403	0.00402185	0.000204047	0.000478479	0.0151584	0.14467
Rhodocyclaceae	0.00250097	0.00326029	0.000672063	0.000403023	0.022271	0.180827
unclassified_IMCC26256	0.0022257	0.00112885	0.00863458	0.00417029	0.0026998	0.063856
KF_JG30_B3	0.00222486	0.00104697	0.000921981	0.000151786	0.0026998	0.063856
unclassified_Gaiellales	0.00207961	0.00118685	0.0165974	0.0103648	0.0026998	0.063856
unclassified_Actinobacteriota	0.00201276	0.00106219	0.00900301	0.00714557	0.00664189	0.0976537
unclassified_Subgroup_17	0.00198444	0.00076935	0.00384931	0.00173838	0.022271	0.180827
Pseudonocardiaceae	0.0019224	0.000987664	0.00666316	0.00345361	0.0026998	0.063856
Gaiellaceae	0.0017534	0.00120064	0.0138299	0.00435129	0.0026998	0.063856
Pedosphaeraceae	0.00174793	0.000700564	0.00438179	0.00105101	0.0026998	0.063856
Nitrospiraceae	0.00173267	0.000459189	0.00279348	0.000914124	0.0151584	0.14467
Inquilinaceae	0.00165643	0.0011898	0.000162428	0.000160617	0.00664189	0.0976537
Sphingobacteriaceae	0.00160419	0.00167201	0.00047034	0.000527615	0.0455003	0.255177
Ferrovibrionaceae	0.00149265	0.000178206	0.00105599	0.00014423	0.00427473	0.0750147
Paenibacillaceae	0.00138052	0.00121573	0.000278027	0.000305202	0.0151584	0.14467
Acetobacteraceae	0.00123732	0.000422012	0.000816037	0.000234436	0.0455003	0.255177
Micropepsaceae	0.0011906	0.000544673	0	0	0.0026998	0.063856
Bacteroidetes_vadinHA17	0.00106766	0.000732296	0.000178457	0.000105607	0.0268091	0.208045
uncultured_Acidobacteria_bacterium	0.0010536	0.00054667	0.00305653	0.00118206	0.00427473	0.0750147
unclassified_Paludibaculum	0.000978981	0.00118255	0	0	0.0321246	0.208045
Alcaligenaceae	0.00097876	0.000252718	0.000532223	0.000251951	0.010128	0.117226
Longimicrobiaceae	0.000899852	0.000461947	0.00280605	0.00179818	0.0455003	0.255177
Bacteroidaceae	0.000867989	0.000640671	0.00010089	0.000131084	0.022271	0.180827
Bifidobacteriaceae	0.000735307	0.000439809	1.82e-05	4.46e-05	0.0026998	0.063856
Opitutaceae	0.000671554	0.000276143	0.00134911	0.000687344	0.0321246	0.208045
Roseiflexaceae	0.000587184	0.000458348	0.00115336	0.000636162	0.0455003	0.255177
uncultured_Chloroflexi_bacterium	0.000559947	0.000322702	0.00200483	0.00125187	0.010128	0.117226
uncultured_actinobacterium	0.00052963	0.00061756	0.00240318	0.00180231	0.010128	0.117226
Rubrobacteriaceae	0.000522655	0.000238414	0.00401847	0.00238293	0.022271	0.180827
Acidobacteriaceae__Subgroup_1	0.000517406	0.000804894	0	0	0.0321246	0.208045
Prevotellaceae	0.000496931	0.000348171	0.000184034	0.000310695	0.0321246	0.208045
A0839	0.000488135	0.000372253	0	0	0.0026998	0.063856
unclassified_Actinomarinales	0.000427875	0.000298681	0.00130933	0.000774221	0.010128	0.117226
unclassified_Thalassobaculales	0.000401042	0.000269017	8.77e-05	0.000146426	0.0151584	0.14467
Prolixibacteraceae	0.000392738	0.000178314	1.18e-05	2.88e-05	0.0026998	0.063856
uncultured_Desulfovirga_sp.	0.000386322	0.000270282	0.00164033	0.000660945	0.0026998	0.063856
AB1	0.000382337	0.000188641	0.000190444	0.000152103	0.0321246	0.208045
Latescibacteraceae	0.000379898	0.000340365	0	0	0.0321246	0.208045
uncultured_prokaryote	0.000318268	7.69e-05	0.000133045	7.95e-05	0.00427473	0.0750147
Muribaculaceae	0.000255429	0.000128533	5.48e-05	9.76e-05	0.0151584	0.14467
Ruminococcaceae	0.000244235	0.000341892	4.62e-05	6.2e-05	0.0455003	0.255177
unclassified_Ardenticatenales	0.000235845	0.000210349	0.000803788	0.000487138	0.022271	0.180827
Anaerolineaceae	0.000224913	0.000173154	0.00158172	0.000332516	0.0026998	0.063856
Anaeromyxobacteraceae	0.000200386	0.000185514	0	0	0.0321246	0.208045
unclassified_Acidimicrobiia	0.000198608	0.000312516	0.00166757	0.000428174	0.0026998	0.063856
uncultured_delta_proteobacterium	0.000189839	0.000225998	0.00039675	0.000131363	0.0321246	0.208045
Rikenellaceae	0.000153023	9.45e-05	4.07e-05	5.94e-05	0.022271	0.180827
unclassified_Acidobacteriota	0.000118309	0.00017187	0.000866559	0.000597805	0.0383188	0.24524
unclassified_Clostridia	0.000115033	8.77e-05	1.1e-05	2.7e-05	0.0268091	0.208045
Entotheonellaceae	0.000110654	0.000150633	0.00046765	0.000130242	0.010128	0.117226
uncultured_Actinomycetales_bacterium	8.04e-05	0.000147515	0.00343864	0.00276064	0.00427473	0.0750147
uncultured_Acidimicrobiales_bacterium	8.03e-05	0.000212525	0.001763	0.00104002	0.0151584	0.14467
unclassified_Verrucomicrobiota	7.09e-05	0.000115398	0.000608513	0.000535175	0.0321246	0.208045
Herpetosiphonaceae	5.4e-05	7.5e-05	0.000826091	0.00103117	0.00427473	0.0750147
uncultured_Armatimonadetes_bacterium	2.45e-05	4.4e-05	0.00034887	0.000120027	0.0026998	0.063856
unclassified_Dehalococcoidia	1.87e-05	4.95e-05	0.000781303	0.00105707	0.022271	0.180827
unclassified_Frankiales	0	0	0.0009659	0.00106946	0.0124193	0.135122
unclassified_Salinisphaerales	0	0	0.000302725	0.000254122	0.0124193	0.135122
uncultured_Myxococcales_bacterium	0	0	0.000280933	0.000160305	0.0124193	0.135122
Phormidiaceae	0	0	0.00087781	0.000949993	0.0455003	0.255177
Sneathiellaceae	0	0	0.000135507	0.000114566	0.0455003	0.255177
unclassified_Candidatus_Levybacteria	0	0	3.63e-05	3.32e-05	0.0455003	0.255177
* Only the family with p value less than 0.05 were exhibted.

## Sheet: Table S6
Table S6 Wilcoxon rank sum test to compare mean relative abundance of the pear rhizosphere and bulk soils at genus level*
genus	YLX(Mean)	YLX(Sd)	YLXY(Mean)	YLXY(Sd)	YLX::YLXY(p)	YLX::YLXY(p-corrected)
Methylophilus	0.227853	0.0291054	0.173938	0.0282636	0.010128	0.177669
Diplorickettsiaceae	0.0401029	0.00559797	0.0299726	0.0054499	0.010128	0.177669
Pseudomonas	0.0393522	0.0108154	0.0211564	0.00205892	0.0026998	0.0901384
Neisseriaceae	0.0360417	0.00455027	0.0270525	0.00381089	0.00664189	0.159869
Microscillaceae	0.0244285	0.00534137	0.0175172	0.00448169	0.0151584	0.217903
Bacillus	0.0216105	0.0156787	0.00198625	0.0010797	0.0026998	0.0901384
Allorhizobium	0.0193155	0.00323045	0.01081	0.00146459	0.0026998	0.0901384
Pseudoxanthomonas	0.0187136	0.00174698	0.0120079	0.00119591	0.0026998	0.0901384
Hydrogenophaga	0.0149292	0.00137684	0.0116297	0.00170233	0.00427473	0.113445
Gemmobacter	0.011962	0.00223141	0.0080237	0.00132175	0.0026998	0.0901384
Cerasicoccus	0.0116546	0.00260006	0.00830238	0.0019448	0.0321246	0.296865
Brevundimonas	0.0108995	0.00176806	0.00735921	0.00118734	0.0026998	0.0901384
Roseovarius	0.0084959	0.00167006	0.0060415	0.001064	0.010128	0.177669
RB41	0.00842857	0.00284415	0.0221716	0.0123614	0.0455003	0.362252
Gemmatimonadaceae	0.007832	0.00328506	0.0224028	0.00511761	0.0026998	0.0901384
MND1	0.00709228	0.00252421	0.0128178	0.00354746	0.010128	0.177669
Caulobacter	0.00661063	0.00143903	0.00419065	0.000776701	0.0026998	0.0901384
unclassified_Holosporaceae	0.00628776	0.000958694	0.00429821	0.000643337	0.010128	0.177669
Legionella	0.00596611	0.00112369	0.00439364	0.000775178	0.022271	0.264948
Sphingopyxis	0.00588231	0.00126866	0.00386258	0.000788042	0.0151584	0.217903
Enterococcus	0.00542294	0.00234518	0.00132048	0.000344246	0.0026998	0.0901384
unclassified_Chloroflexi	0.00539665	0.00192092	0.0184211	0.00559383	0.0026998	0.0901384
Candidatus_Protochlamydia	0.00450954	0.000874889	0.00340701	0.000819411	0.0455003	0.362252
Subgroup_10	0.00403561	0.00179774	0.0100308	0.00493391	0.0321246	0.296865
Porphyrobacter	0.00384677	0.000559246	0.00291337	0.000389679	0.022271	0.264948
Haliangium	0.00382528	0.00218844	0.00865447	0.00470192	0.0321246	0.296865
Streptococcus	0.00374712	0.00261675	0.0021564	0.00455369	0.0455003	0.362252
uncultured_soil_bacterium	0.00372963	0.00176127	0.00568107	0.00183087	0.0321246	0.296865
uncultured_Firmicutes_bacterium	0.00340062	0.00187283	0.00900628	0.00315733	0.010128	0.177669
Variovorax	0.00333045	0.00158173	0.00197013	0.00343303	0.0455003	0.362252
Skermanella	0.00331337	0.000607405	0.00218498	0.000699008	0.022271	0.264948
Reyranella	0.00329347	0.00154831	0.0015787	0.000511134	0.022271	0.264948
Bradyrhizobium	0.00329177	0.000833547	0.00183591	0.000570652	0.00664189	0.159869
Escherichia_Shigella	0.00307635	0.00150334	0.00092648	0.000221179	0.00427473	0.113445
unclassified_Subgroup_7	0.00303004	0.00147762	0.00916757	0.00354743	0.010128	0.177669
unclassified_Reyranellaceae	0.00257457	0.00156844	0.00096924	0.00147763	0.0321246	0.296865
Solirubrobacter	0.00256555	0.00164944	0.00794668	0.00385864	0.0151584	0.217903
Ellin6067	0.00245418	0.00138425	0.00509734	0.00142018	0.0151584	0.217903
unclassified_67_14	0.00241642	0.00124479	0.00673286	0.00309667	0.010128	0.177669
unclassified_IMCC26256	0.0022152	0.00112245	0.00860939	0.00416322	0.0026998	0.0901384
unclassified_KF_JG30_B3	0.00221428	0.00103761	0.000918862	0.00015008	0.0026998	0.0901384
Acinetobacter	0.00211026	0.00404944	0.000195908	0.000479874	0.022271	0.264948
Clostridium_sensu_stricto_1	0.00209985	0.00110331	0.000508894	0.000340783	0.0026998	0.0901384
Phyllobacterium	0.00206266	0.00125156	0	0	0.0026998	0.0901384
unclassified_Gaiellales	0.00201396	0.00116064	0.0161063	0.00994395	0.0026998	0.0901384
unclassified_Actinobacteriota	0.00200297	0.00105504	0.00897782	0.00713476	0.00664189	0.159869
unclassified_Subgroup_17	0.00197543	0.000764602	0.00383799	0.001736	0.022271	0.264948
Bosea	0.00192548	0.000410475	0.00100137	0.000264119	0.0026998	0.0901384
Mesorhizobium	0.00187926	0.000943823	0.000826926	0.00053212	0.0455003	0.362252
Sediminibacterium	0.00185085	0.000446038	0.00127148	0.000184811	0.0151584	0.217903
Novosphingobium	0.00184308	0.00153522	5.52e-05	0.000135299	0.0026998	0.0901384
Leptothrix	0.00174928	0.000586322	0.00115269	0.000271583	0.0455003	0.362252
Gaiella	0.00174452	0.00119265	0.0137868	0.0043433	0.0026998	0.0901384
Nitrospira	0.00172489	0.00045413	0.00278399	0.000908887	0.0151584	0.217903
Inquilinus	0.0016475	0.00118031	0.000162039	0.000160265	0.00664189	0.159869
Ferrovibrio	0.00148682	0.000179889	0.00105259	0.000143569	0.00427473	0.113445
Sphingobium	0.00143867	0.000965561	0.00556041	0.00294751	0.022271	0.264948
uncultured_Acidobacteria_bacterium	0.00142806	0.000649834	0.0034372	0.0012629	0.010128	0.177669
Domibacillus	0.00135736	0.00149166	0	0	0.0321246	0.296865
Paenibacillus	0.00133112	0.0011056	0.000247696	0.000302155	0.010128	0.177669
unclassified_Micropepsaceae	0.00118577	0.000543144	0	0	0.0026998	0.0901384
SWB02	0.00118097	0.00110866	0.000153932	0.000257641	0.022271	0.264948
unclassified_Pedosphaeraceae	0.00113624	0.000341608	0.0031305	0.000532088	0.0026998	0.0901384
Roseomonas	0.00107208	0.000321671	0.000690002	0.000166923	0.0026998	0.0901384
Blastomonas	0.00105532	0.000952039	0	0	0.0321246	0.296865
Hyphomicrobium	0.00102879	0.000189477	0.000477567	0.000487221	0.0321246	0.296865
Dokdonella	0.000997139	0.00113077	0	0	0.010128	0.177669
unclassified_Paludibaculum	0.000974827	0.00117754	0	0	0.0321246	0.296865
Achromobacter	0.000960052	0.000238119	0.000505418	0.000250136	0.010128	0.177669
unclassified_Acidimicrobiia	0.000938158	0.000926236	0.00506196	0.00173182	0.00427473	0.113445
Bacteroides	0.000865341	0.000639042	0.000100477	0.000130563	0.022271	0.264948
uncultured_Chloroflexi_bacterium	0.00083061	0.000614073	0.00271528	0.000815169	0.0026998	0.0901384
uncultured_actinobacterium	0.000791261	0.000869736	0.00482938	0.00188586	0.0026998	0.0901384
Chitinophaga	0.000790556	0.000595182	0.000241879	0.000502652	0.022271	0.264948
Bifidobacterium	0.000732819	0.000438939	0	0	0.0026998	0.0901384
Aquabacterium	0.000699933	0.00093121	0	0	0.010128	0.177669
Opitutus	0.000618251	0.0002246	0.00112178	0.000310287	0.0151584	0.217903
uncultured_prokaryote	0.000563401	0.000487084	0.000132594	7.92e-05	0.00427473	0.113445
unclassified_Steroidobacteraceae	0.00055833	0.00026182	0.000255668	0.000274685	0.0455003	0.362252
Lechevalieria	0.000544973	0.000416522	0.00391247	0.00414648	0.0026998	0.0901384
Rubrobacter	0.000520094	0.000235849	0.00400393	0.0023728	0.022271	0.264948
ADurb.Bin063_1	0.000446784	0.000310555	6.84e-06	1.67e-05	0.0455003	0.362252
uncultured_beta_proteobacterium	0.000420513	0.000523774	0.00164786	0.000942299	0.0268091	0.296865
unclassified_Moraxellaceae	0.000414249	0.000607582	0	0	0.0321246	0.296865
Ensifer	0.000413744	0.000383493	0	0	0.0321246	0.296865
unclassified_Thalassobaculales	0.000398969	0.000266701	8.75e-05	0.000146062	0.0151584	0.217903
uncultured_Desulfovirga_sp.	0.000384496	0.000269018	0.00163529	0.000660071	0.0026998	0.0901384
Altererythrobacter	0.000381325	0.000990698	0.00168761	0.000614468	0.0321246	0.296865
unclassified_AB1	0.000380998	0.000188053	0.000189908	0.000151615	0.0321246	0.296865
unclassified_Latescibacteraceae	0.000378263	0.000338708	0	0	0.0321246	0.296865
unclassified_A0839	0.00037183	0.000166412	0	0	0.0026998	0.0901384
WCHB1_32	0.0003614	0.000171314	0	0	0.0026998	0.0901384
Agromyces	0.000353476	0.000368053	0.000928167	0.000379281	0.0321246	0.296865
Hassallia	0.000329254	0.00020998	9.18e-05	0.000224782	0.0321246	0.296865
Haliscomenobacter	0.000258509	0.000105753	6.68e-05	0.000107897	0.0321246	0.296865
unclassified_Longimicrobiaceae	0.000257761	9.58e-05	0.000963738	0.000661996	0.0455003	0.362252
Candidatus_Udaeobacter	0.00025657	0.000179012	0.00125088	0.000612323	0.0026998	0.0901384
unclassified_Rhizobiales	0.000248209	0.000405343	0.00155224	0.00106752	0.0455003	0.362252
uncultured_delta_proteobacterium	0.00024012	0.000353462	0.000535632	0.000245713	0.0321246	0.296865
unclassified_Muribaculaceae	0.000236273	0.000114042	3.99e-05	9.78e-05	0.010128	0.177669
Pajaroellobacter	0.000223588	0.000295188	0.00116452	0.000982389	0.010128	0.177669
JCM_18997	0.000214022	0.000272139	0.00143473	0.00123728	0.0321246	0.296865
Candidatus_Paracaedibacter	0.000213125	0.000151258	2.35e-05	5.75e-05	0.0455003	0.362252
unclassified_Fodinicurvataceae	0.000212798	0.000171946	1.45e-05	3.55e-05	0.0184162	0.254143
Kouleothrix	0.000210954	0.000206446	0.000886777	0.000492392	0.0151584	0.217903
Anaeromyxobacter	0.000199765	0.000184997	0	0	0.0321246	0.296865
unclassified_Anaerolineaceae	0.000185722	0.00015483	0.00144286	0.000331701	0.0026998	0.0901384
unclassified_Solirubrobacteraceae	0.000153564	0.000183768	0.00140731	0.00110508	0.0268091	0.296865
Faecalibacterium	0.000144381	0.000273228	0	0	0.0321246	0.296865
unclassified_Acidobacteriota	0.00011755	0.000170544	0.000863764	0.000596113	0.0383188	0.350973
uncultured_Nitrosomonadales_bacterium	0.000115492	0.000198253	0.00106627	0.000764298	0.0184162	0.254143
unclassified_Clostridia	0.000114567	8.73e-05	1.1e-05	2.7e-05	0.0268091	0.296865
Prevotella	0.000103469	0.000111781	7.82e-06	1.92e-05	0.0455003	0.362252
unclassified_Entotheonellaceae	0.000101697	0.000144558	0.00045526	0.000141897	0.010128	0.177669
uncultured_Actinomycetales_bacterium	8e-05	0.000146987	0.0034277	0.00275539	0.00427473	0.113445
Kibdelosporangium	7.5e-05	0.000171034	0.000785736	0.000393744	0.00427473	0.113445
unclassified_Verrucomicrobiota	7.05e-05	0.000114537	0.000606627	0.000534229	0.0321246	0.296865
Herpetosiphon	5.37e-05	7.47e-05	0.000824066	0.00102968	0.00427473	0.113445
Ellin6055	2.96e-05	5.59e-05	0.00358974	0.00220648	0.0184162	0.254143
uncultured_Armatimonadetes_bacterium	2.44e-05	4.38e-05	0.000347736	0.000119748	0.0026998	0.0901384
unclassified_Dehalococcoidia	1.86e-05	4.93e-05	0.000778221	0.00105223	0.022271	0.264948
Ellin517	5.93e-06	1.57e-05	0.000267227	0.000233883	0.0151584	0.217903
unclassified_Frankiales	0	0	0.000962289	0.00106478	0.0124193	0.207323
unclassified_Salinisphaerales	0	0	0.000301745	0.000253266	0.0124193	0.207323
uncultured_Myxococcales_bacterium	0	0	0.000279993	0.000159853	0.0124193	0.207323
Parviterribacter	0	0	0.000508875	0.000529901	0.0455003	0.362252
Rivibacter	0	0	0.000732437	0.00078629	0.0455003	0.362252
Tychonema_CCAP_1459_11B	0	0	0.000874496	0.000945632	0.0455003	0.362252
unclassified_Candidatus_Levybacteria	0	0	3.62e-05	3.3e-05	0.0455003	0.362252
unclassified_Sneathiellaceae	0	0	0.000135052	0.000114139	0.0455003	0.362252
* Only the genera with p value less than 0.05 were exhibted.

## Sheet: Table S7
Table S7 Bacterial phenotypic differences between the pear rhizosphere soil and bulk soil predicted by BugBase *
phenotypes	YLX: mean rel.freq.(%)	YLX: std.dev.(%)	YLXY: mean rel.freq.(%)	YLXY: std.dev.(%)	p-values	p-values (corrected)	Difference between means	95.0% lower CI	95.0% upper CI
Aerobic	37.7984	1.05489	45.043	3.36856	0.00389651	0.0050098	-7.24457	-11.1076	-3.3815
Anaerobic	13.2631	3.37684	17.9824	3.41216	0.0432425	0.0432425	-4.71927	-9.26617	-0.172367
Contains_Mobile_Elements	80.0234	5.74857	73.0128	3.87254	0.035875	0.0403594	7.01061	0.558048	13.4632
Facultatively_Anaerobic	8.66454	1.09715	5.77034	0.569077	0.000286189	0.00128785	2.8942	1.73511	4.05328
Forms_Biofilms	8.86433	1.76838	4.48916	0.444178	0.000671063	0.00201319	4.37518	2.59917	6.15119
Gram_Negative	88.816	3.40016	77.9398	4.77934	0.00219637	0.00494184	10.8762	5.09111	16.6613
Gram_Positive	11.184	3.40016	22.0602	4.77934	0.00219637	0.00395347	-10.8762	-16.6613	-5.09111
Potentially_Pathogenic	87.9089	3.85648	70.6963	4.53849	5.75082e-05	0.000517574	17.2126	11.4776	22.9476
Stress_Tolerant	39.2671	4.75099	27.164	5.14488	0.00229201	0.00343802	12.1031	5.42413	18.7821
* The significant difference was evaluated by Student’s t-test (p < 0.05).

## Sheet: Tabe S8
Table S8 Bacterial ecological function differences between the pear rhizosphere soil and bulk soil predicted by FAPROTAX *
FAPROTAX	YLX: mean rel.freq.(%)	YLX: std.dev.(%)	YLXY: mean rel.freq.(%)	YLXY: std.dev.(%)	p-values	p-values (corrected)	Difference between means	95.0% lower CI	95.0% upper CI
nitrogen_fixation	1.26684	0.139007	0.948539	0.0512853119058	0.0008667684447682955	0.00953445289245125	0.318298	0.17673758097034056	0.4598583461236484
nitrogen_respiration	1.18009	0.0774157025168	0.907673	0.116081	0.00179931648142162	0.00989624064781891	0.272418	0.13349667348841457	0.41133954276098533
chemoheterotrophy	23.3997	0.344736	24.3702	0.426614	0.0023785986516988524	0.00872152838956246	-0.970539	-1.50208	-0.438998
aerobic_chemoheterotrophy	10.51	0.662724	11.4212	0.864004	0.08456697015240221	0.23255916791910608	-0.911157	-1.97381	0.1514973491321724
fermentation	1.3449	0.383832	0.766264	0.749475	0.16098120110808134	0.35415864243777895	0.578635	-0.292794	1.4500638191922113
animal_parasites_or_symbionts	1.34418	0.388235	1.03626	0.487704	0.28145848859914535	0.4422919106557998	0.307926	-0.29737	0.9132212746467206
nitrate_reduction	13.4796	0.825705	13.8654	0.604953	0.391533389208635	0.5383584101618731	-0.385763	-1.33895	0.5674220761452922
ureolysis	12.1405	0.672535	12.4367	1.13685	0.6224253303065677	0.7607420703746938	-0.296206	-1.63494	1.0425310610138077
methanol_oxidation	11.7166	0.78071	11.9368	1.14132	0.7233134572975588	0.7956448030273147	-0.220175	-1.59184	1.151487144975955
methylotrophy	11.7236	0.783214	11.9373	1.14164	0.7313338094125217	0.7313338094125217	-0.213704	-1.58644	1.1590361720223894
nitrate_respiration	1.14633	0.0911158556261	0.907673	0.116081	0.004313618605755076	0.03163320310887056	0.238659	0.09509679884917495	0.38222137149094537
human_pathogens_all	1.00828	0.380266	0.97406	0.391659	0.8865131605540526	0.9287280729613885	0.0342219146327	-0.483756	0.5521998339906518
* Only the mean relative abundances greater than 1% were exhibted. The significant difference was evaluated by Student’s t-test (p < 0.05).

## Sheet: Table S9
Table S9 Analysis of the antagonistic effect of pear tree rhizosphere soil bacteria against F. oxysporum *
Rhizosphere soil	1	2	3	4	5	6	7	8	9	10	11	12
A															40 mm < The diameter of inhibibition zone ≤ 45 mm
B															35 mm < The diameter of inhibibition zone ≤ 40 mm
C															30 mm < The diameter of inhibibition zone ≤ 35 mm
D															The diameter of inhibibition zone ≤ 30 mm
E
F
G
H
* The layout in the figure represented a simulated 96-well plate format.

## Sheet: Table S10
Table S10 Analysis of the antagonistic effect of bulk soil bacteria against F. oxysporum *
Bulk soil	1	2	3	4	5	6	7	8	9	10	11	12
A															40 mm < The diameter of inhibibition zone ≤ 45 mm
B															35 mm < The diameter of inhibibition zone ≤ 40 mm
C															30 mm < The diameter of inhibibition zone ≤ 35 mm
D															The diameter of inhibibition zone ≤ 30 mm
E
F
G
H
* The layout in the figure represented a simulated 96-well plate format.
